# Supplementary material for: Synthesis and application of novel catalytically active polymers containing 1,4,7-triazacyclononanes
Source: Royal Society of Chemistry journal article supplement (doi:10.1039/b105560g), 2001-01-01
Supplement: b105560g.doc [file b105560g.doc]

SUPPLEMENTARY INFORMATION

Synthesis and application of novel catalytically active polymers containing 1,4,7-triazacyclononanes

Achim Grenz,Simona Ceccarelli and Carsten Bolm*

Institut für Organische Chemie, RWTH Aachen, Prof. Pirlet-Strasse 1, 52074 Aachen, Germany

Fax: +49 (0)241‑8888391; Tel: +49 (0)241-804675; E-mail: carsten.bolm@oc.rwth-aachen.de

**General remarks:**

All manipulations requiring inert atmosphere were conducted under an atmosphere of Ar using standard Schlenk techniques unless otherwise noted. 1H- and 13C-NMR spectra were recorded on a Varian Unity 500 (at 500 and 125 MHz) or a Varian Inova 400 spectrometer (at 400 and 100 MHz), chemical shifts are given in ppm with internal referencing to the solvent peaks. IR spectra were measured on a Perkin Elmer 1760 S, MS spectra on a Varian MAT 212 or a Finnigan SSQ7000 mass spectrometer with EI ionization. HRMS were recorded on a Finnigan MAT 95. All experiments were conducted at least twice to ensure reproducibility.

**General experimental procedure for catalytic oxidation reactions:**

A solution of 1 mmol of substrate in acetone (GC quality, 1 mL) is cooled to 0-2°C and treated with the ligand (for **4**: 2.7 mg in 48 L of MeOH, 0.01 mmol; for **5** or **6**: 2.7 mg in 48 L of MeOH, 0.5 mol) and Mn(OAc)24 H­2O (2.5 mg in 141 L of H2O, 0.01 mmol). The mixture is stirred at 0-2°C for 15 min. Oxalic buffer (0.15 M, 133 L, 0.02 mmol) is added, followed within 1-2 min by H2O2 (30%, 0.4 mL, 4 mmol). After stirring for 1.5 h another aliquot of H2O2 is added (0.2 mL, 2 mmol, total amount added = 6 mmol). After a reaction time of 2.5-3 h, the excess oxidant is destroyed by adding a small quantity of MnO2, the reaction mixture is diluted with approx. 2 mL of CH2Cl2 and the organic phase is separated and analysed by gas-chromatography (Column: HP-Ultra-2, 25m x 0.2 mm x 0.33 m; Carrier gas: N2 (50 Kpa); Inj.: 300°C; Det.: 300°C; 40°C (3 min), 5°C/min, 160°C (1 min). All reactants and products are detected within 30 min).

**Synthesis of Diamide 3:**

A 250 mL round bottom flask equipped with a reflux condenser is charged with LiBr (2.0 g, 24 mmol), Na2CO3 (10.0 g, 96 mmol) and bischloroacetamide **1** (2.89 g, 12 mmol) in acetonitrile (160 mL). The mixture is heated to reflux and a solution of **2** (1.48 g, 12 mmol) in acetonitrile (20 mL) is added in one portion. After six hours of gentle reflux the reaction mixture is cooled to 0°C and solids are removed by filtration. The solvent is evaporated under reduced pressure and the residue is redissolved in methanol (50 mL). The pale yellow solution is filtered over a plug of Al2O3 (neutral) and the solvent is removed yielding 3.9 g (97 %) of **3** which is used without further purification.

MS (EI): m/z (rel. Int.) = 291 (M+, 9); 253 (38); 211 (100); 189 (12); 127 (42); 99 (68).

IR (KBr):  = 2966; 2867; 2817; 1631; 1494; 1449; 1401; 1343; 1251; 1121; 904; 742; 716 cm-1.

EI-HRMS: calculated for C16H25N3O2: 291.1947; found: 291.1947.

#### Synthesis of Monomer 4:

Lithiumaluminiumhydride (1.6 g, 44 mmol) is placed in a 500 mL flask under argon atmosphere and suspended in dry THF (300 mL). After cooling to 0°C **3** (3.2 g, 11 mmol) is added portionwise under vigorous stirring The resulting mixture is heated to reflux for six hours. After cooling to 0°C the reaction is quenched by subsequent addition of distilled water (2.5 mL), aqueous 20% NaOH (3.0 mL) and again distilled water (10 mL). After stirring for another two hours and warming to room temperature the suspension is filtered and the solvents are removed under reduced pressure. The resulting syrup is dissolved in hexanes (300 mL) and washed twice with aqueous 10% NaOH (50 mL). The organic layer is dried over Na2SO4 and concentrated. Purification of the crude product is achieved either by bulb-to-bulb distillation (bp.: 130°C at 0.015 mmHg) or flash chromatography on silica gel (MeOH/saturated aqueous NH4OH 8:2). In the latter case, after evaporation of the eluent, the residue is dissolved in toluene and filtered to eliminate contaminating silica. In both cases approximately 500 mg of monomer **4** are obtained (ca. 15 % overall yield for the two steps).

MS (MS): m/z (rel. Int.) = 264 (M+H+, 3); 219 (16); 208 (14); 193 (55); 153 (49); 127 (100); 101 (83); 79 (23); 58 (61).

IR (capillary):  = 2962; 2939; 2868; 2840; 2787; 1452; 1369; 1334; 1319; 1297; 1266; 1167; 1151; 1104; 1078; 1050; 1028; 909 cm-1.

EI-HRMS:calculated for C16H29N3 263.2361, found: 263.2362.

a) *exo*-**4:**

1H-NMR (500 MHz, CDCl3):  = 1.22 (m, 2 H); 1.29 (m, 2 H); 1.50 (m, 1 H); 2.38 (s, 6 H); 2.47 (m, 2 H); 2.55 – 2.95 (m, 12 H); 2.65 (m, 1 H); 2.80 (m, 1 H); 5.99 (dd, *J*= 2.7 Hz, *J* = 5.5 Hz, 1 H); 6.10 (m, 1 H).

13C-NMR (100 MHz, CDCl3):  = 31.9; 38.0; 41.7; 44.8; 45.3; 46.5; 46.5; 56.3; 56.4; 57.1; 57.1; 57.1; 57.3; 65.8, 136.4; 136.6.

(b) *endo*-**4:**

1H-NMR (500 MHz, CDCl3):  = 0.55 (ddd, *J*= 3.4 Hz, *J* = 4.0 Hz, *J* = 11.6 Hz, 1 H); 1.20 (m, 1 H); 1.40 (m, 1 H); 1.81 (ddd; *J*= 3.7 Hz, *J* = 8.2 Hz, *J* = 11.6 Hz, 1 H); 2.16 (m, 1 H); 2.16 (m, 2 H); 2.38 (s, 6 H); 2.55 – 2.95 (m, 12 H); 2.75 (m, 1 H); 2.85 (m, 1 H); 5.96 (dd, *J* = 3.1 Hz, *J* = 5.8 Hz, 1 H); 6.10 (m, 1 H).

13C-NMR (100 MHz, CDCl3):  = 31.9; 38.0; 42.4; 44.9; 46.5; 46.5; 49.4; 56.3; 56.4; 57.1; 57.1; 57.1; 57.3; 64.1, 132.4; 136.5.

**Synthesis of Polymer 5:**

# To a solution of Schrock’s catalyst (87 mg, 0.114 mmol) in dry toluene (1.0 mL) at room temperature under argon is added dropwise under vigorous stirring a solution of monomer **4** (600 mg, 2.27 mmol) in toluene (7.5 mL). The resulting yellow-orange solution is stirred at room temperature for 4 h, then pivaldehyde (0.20 mL) is added. After 30 min stirring at room temperature, the solvent is evaporated completely, yielding the crude polymer as a clear yellow glass (693 mg). NMR analysis reveals complete conversion of the monomer. The polymer is employed without further purification.

1H-NMR of polymer **5**.

13C-NMR of polymer **5**.

**Synthesis of Polymer 6:**

A solution of polymer **5** (200 mg) in ethylene glycol monomethylether (4.0 mL) is treated at room temperature with NaOH (60 mg, 1.48 mmol) and *p*-toluenesulfonylhydrazide (275 mg, 1.48 mmol). The mixture is warmed to 120-130°C and stirred for 1.5 h. The solvent is evaporated completely and the gummy residue is washed several times with 6 N NaOH and water with the aid of a sonicating bath. The crude polymer is then dissolved in MeOH and filtered. Evaporation of the solvent leaves a creamy-white powder, which is suspended in methylene chloride and sonicated for 10 min. After centrifugation, the supernatant yellow solution is separated and evaporated, yielding the polymer as a clear yellow glass (140 mg). NMR reveals ca. 86% hydrogenation of the double bonds.

1H-NMR of polymer **6**.
